1           **CSF metabolites associated with biomarkers of**  
2                           **Alzheimer's disease pathology**

3           Ruocheng Dong<sup>1</sup>, Qiongshi Lu<sup>2</sup>, Hyunseung Kang<sup>2</sup>, Ivonne  
4           Suridjan<sup>3</sup>, Gwendlyn Kollmorgen<sup>4</sup>, Norbert Wild<sup>4</sup>, Yuetiva  
5           Deming<sup>1,5,6</sup>, Carol A. Van Hulle<sup>5,6</sup>, Rozalyn M. Anderson<sup>5,7</sup>, Henrik  
6           Zetterberg<sup>8-12</sup>, Kaj Blennow<sup>8,9</sup>, Cynthia M. Carlsson<sup>5-7</sup>, Sanjay  
7           Asthana<sup>5-7</sup>, Sterling C. Johnson<sup>5-7,13</sup>, Corinne D. Engelman<sup>1,6,13\*</sup>

8

9           <sup>1</sup>Department of Population Health Sciences, University of  
10           Wisconsin-Madison School of Medicine and Public Health,  
11                           Madison, WI, USA

12           <sup>2</sup>Department of Biostatistics and Medical Informatics, University  
13           of Wisconsin-Madison School of Medicine and Public Health,  
14                           Madison, WI, USA

15           <sup>3</sup>Roche Diagnostics International Ltd, Rotkreuz, Switzerland

16           <sup>4</sup>Roche Diagnostics GmbH, Penzberg, Germany

17           <sup>5</sup>Department of Medicine, School of Medicine and Public Health,  
18           University of Wisconsin-Madison, Madison, Wisconsin, USA

19           <sup>6</sup>Wisconsin Alzheimer's Disease Research Center, University of  
20           Wisconsin-Madison School of Medicine and Public Health,  
21                           Madison, WI, USA

22           <sup>7</sup>Geriatrics Research Education and Clinical Center, Middleton VA  
23                           Hospital, Madison, WI, USA

24           <sup>8</sup>Department of Psychiatry and Neurochemistry, Institute of  
25           Neuroscience and Physiology, The Sahlgrenska Academy at  
26                           University of Gothenburg, Mölndal, S-43180, Sweden

27 <sup>9</sup>Clinical Neurochemistry Laboratory, Sahlgrenska University

28 Hospital, Mölndal, S-43180, Sweden

29 <sup>10</sup>UK Dementia Research Institute at UCL, London, WC1E6BT, UK

30 <sup>11</sup>Department of Neurodegenerative Disease, UCL Institute of

31 Neurology, London, WC1H0AL, UK

32 <sup>12</sup>Hong Kong Center for Neurodegenerative Diseases, Clear Water

33 Bay, Hong Kong, China

34 <sup>13</sup>Wisconsin Alzheimer's Institute, University of Wisconsin-

35 Madison School of Medicine and Public Health, Madison, WI, USA

36 \*Correspondence:

37 Corinne D. Engelman

38 608-265-5491

39 [cengelman@wisc.edu](mailto:cengelman@wisc.edu)

## 40 **Abstract**

### 41 **INTRODUCTION:**

42 Metabolomics technology facilitates studying  
43 associations between small molecules and disease processes.  
44 Correlating metabolites in cerebrospinal fluid (CSF) with  
45 Alzheimer's disease (AD) CSF biomarkers may elucidate  
46 additional changes that are associated with early AD  
47 pathology and enhance our knowledge of the disease.

### 48 **METHODS:**

49 The relative abundance of untargeted metabolites was  
50 assessed in 161 individuals. A metabolome-wide association  
51 study (MWAS) was conducted between 269 CSF metabolites

52 and protein biomarkers reflecting brain amyloidosis, tau  
53 pathology, neuronal and synaptic degeneration, and  
54 astrocyte or microglial activation and neuroinflammation.  
55 Linear mixed-effects regression analyses were performed  
56 with random intercepts for sample relatedness and repeated  
57 measurements and fixed effects for age, sex, and years of  
58 education. The metabolome-wide significance was  
59 determined by a false discovery rate threshold of 0.05. The  
60 significant metabolites were replicated in 154 independent  
61 individuals. Mendelian randomization was performed using  
62 genome-wide significant single nucleotide polymorphisms  
63 from a CSF metabolites genome-wide association study.

#### 64 **RESULTS:**

65 MWAS results showed several significantly associated  
66 metabolites for all the biomarkers except A $\beta$ <sub>42/40</sub> and IL-6.  
67 Genetic variants associated with metabolites and Mendelian  
68 randomization analysis provided evidence for a causal  
69 association of metabolites for soluble triggering receptor  
70 expressed on myeloid cells 2 (sTREM2), amyloid  $\beta$  (A $\beta$ <sub>40</sub>),  
71  $\alpha$ -synuclein, total tau, phosphorylated tau, and neurogranin,  
72 for example, palmitoyl sphingomyelin (d18:1/16:0) for  
73 sTREM2, and erythritol for A $\beta$ <sub>40</sub> and  $\alpha$ -synuclein.

#### 74 **DISCUSSION:**

75            This study provides evidence that CSF metabolites are  
76 associated with AD-related pathology, and many of these  
77 associations may be causal.

78

79    **Keywords:** Alzheimer’s disease, metabolomics, CSF

80 NeuroToolKit biomarkers, Mendelian randomization

81

82

83 **1. Introduction**

84           The neuropathological changes of Alzheimer’s disease  
85 (AD) consist of extracellular amyloid- $\beta$  ( $A\beta$ ) plaques and  
86 intracellular neurofibrillary tangles of hyperphosphorylated  
87 tau proteins in the brain[1]. Well-established core  
88 biomarkers that reflect AD pathology and show promising  
89 performance in evaluating AD risk and diagnosing AD are  
90 the 42 amino acid form  $A\beta$  ( $A\beta_{42}$ ), the ratio of  $A\beta_{42}/40$ ,  
91 phosphorylated tau (P-tau), and total tau (T-tau) in the  
92 cerebrospinal fluid (CSF)[2]. However, it has been suggested  
93 that other pathophysiology such as neuroinflammation  
94 through glial activation and neuronal and synaptic  
95 degeneration also contribute to symptomatic AD, and CSF  
96 biomarkers of these may provide valuable information about  
97 disease progression[2]. Thus, the NeuroToolKit (NTK), a  
98 panel of automated CSF immunoassays, was introduced to  
99 complement the established core AD biomarkers[3]. The  
100 NTK panel includes S100 calcium-binding protein B  
101 (S100b), chitinase-3-like protein 1 (YKL-40), and glial  
102 fibrillary acidic protein (GFAP) as markers of astrocyte  
103 activation; soluble triggering receptor expressed on myeloid  
104 cells 2 (sTREM2) and interleukin-6 (IL-6) as markers of  
105 microglial activation and inflammation; and neurofilament

106 light (NfL), neurogranin, and  $\alpha$ -synuclein as markers of  
107 axonal injury and synaptic dysfunction[4].

108           Untargeted metabolomics technology is a promising  
109 approach that can simultaneously identify and quantify a  
110 large number of small molecules (<1500 Da, *e.g.*, lipids) in a  
111 biological sample[5]. Previous research has shown that  
112 metabolomic changes in the human brain and CSF were  
113 associated with AD status and AD pathological  
114 alterations[6]. For example, Koal *et al.*[6] identified eight  
115 metabolites that were significantly increased in the CSF  
116 samples with AD-like pathology including an acylcarnitine  
117 (C3), two sphingomyelins [SM (d18:1/18:0) and SM  
118 (d18:1/18:1)], and five glycerophospholipids (PC aa C32:0,  
119 PC aa C34:1, PC aa C36:1, PC aa C38:4, and PC aa C38:6).  
120 However, no studies have examined associations between  
121 the untargeted CSF metabolome and a broad panel of  
122 biomarkers such as the NTK panel. Thus, our study aims to  
123 link CSF metabolites with established and developing AD  
124 biomarkers with the goals of (1) identifying individual CSF  
125 metabolites that are associated with the CSF NTK  
126 biomarkers and (2) conducting Mendelian randomization  
127 (MR) to determine if the CSF metabolites significantly  
128 associated with NTK biomarkers are likely to be in the causal

129 pathway instead of simply changing with, or as a result of,  
130 AD biomarker changes.

## 131 **2. Methods**

### 132 **2.1 Participants**

133 The Wisconsin Registry for Alzheimer's Prevention  
134 (WRAP) began recruitment in 2001 as a prospective cohort  
135 study, with initial follow-up four years after baseline and  
136 subsequent ongoing follow-up every two years. WRAP is  
137 comprised of initially cognitively-unimpaired, asymptomatic,  
138 middle-aged (between 40 and 65) adults enriched for  
139 parental history of clinical AD[7]. At each visit, the  
140 participants undergo comprehensive medical and cognitive  
141 evaluations. Additional details of the study design and  
142 methods of WRAP have been described previously[7]. From  
143 the WRAP cohort, we identified 161 self-reported non-  
144 Hispanic white individuals with longitudinal CSF biomarker  
145 and metabolomic data. The sample size for other  
146 racial/ethnic groups was too small ( $n < 10$ ) to include in the  
147 analyses.

148 The Wisconsin Alzheimer's Disease Research Center's  
149 (ADRC) clinical core cohorts started in 2009 and are  
150 comprised of well-characterized participants who undergo  
151 cognitive testing and physical exams every two years[8]. The  
152 Wisconsin ADRC has a cohort of initially cognitively-

153 unimpaired, asymptomatic middle-aged (between 45 and 65)  
154 adults with a similar study design to WRAP (the  
155 **Investigating Memory in Preclinical AD-Causes and**  
156 **Treatments [IMPACT] cohort**)[9–11]. From the IMPACT  
157 cohort, we identified 154 self-reported non-Hispanic white  
158 participants with cross-sectional CSF biomarker and  
159 metabolomic data. As with WRAP, the sample size for other  
160 racial/ethnic groups was too small ( $n < 10$ ) to include in the  
161 analyses.

162         This study was conducted with the approval of the  
163 University of Wisconsin Institutional Review Board, and all  
164 participants provided signed informed consent before  
165 participation.

## 166 **2.2 CSF sample collection and biomarkers**

### 167 **quantification**

168         Fasting CSF samples were collected via lumbar  
169 puncture using a Sprotte 25- or 24-gauge spinal needle at the  
170 L3/4 or L4/5 interspace with gentle extraction into  
171 polypropylene syringes. More details can be found in the  
172 previous study[9]. The CSF collection for WRAP and the  
173 Wisconsin ADRC followed the same protocol, and the  
174 lumbar puncture for both studies was performed by the same  
175 group of well-trained individuals.



176 All CSF samples were batched together and assayed  
177 for the NTK biomarkers at the Clinical Neurochemistry  
178 Laboratory, University of Gothenburg, using the same lot of  
179 reagents, under strict quality control procedures. The  
180 immunoassays of Elecsys® A $\beta$ (1-42), P-tau(181P) and T-tau,  
181 as well as S100b and IL-6, were performed on a cobas e 601  
182 analyzer[3]. The remaining NTK panel was assayed on a  
183 cobas e 411 analyzer including A $\beta$ (1-40),  $\alpha$ -synuclein, GFAP,  
184 YKL-40, sTREM2, NfL, and neurogranin[3].

### 185 **2.3 CSF metabolomic profiling and quality control**

186 CSF metabolomic analyses and quantification were  
187 performed in one batch by Metabolon (Durham, NC) using  
188 an untargeted approach, based on Ultrahigh Performance  
189 Liquid Chromatography-Tandem Mass Spectrometry  
190 platform (UPLC-MS/MS)[12]. Details of the metabolomic  
191 profiling were described in an earlier study[13].

192 A total of 412 CSF metabolites were identified and quality  
193 control procedures were performed. First, 46 metabolites  
194 missing for at least 80% of the individuals were excluded.  
195 Then the values for each of the remaining metabolites were  
196 scaled so that the median equaled 1. Two metabolites with an  
197 interquartile range (IQR) of zero were excluded and no  
198 metabolites had zero variability between individuals. Log<sub>10</sub>  
199 transformation was applied to normalize the data. After

200 quality control, 269 metabolites with known biochemical  
201 names remained for this investigation. The missing  
202 percentage of each metabolite in WRAP and Wisconsin  
203 ADRC is available in Supplemental Table 1.

#### 204 **2.4 Genotyping and quality control**

205 In the WRAP participants, DNA was extracted from  
206 whole blood using the PUREGENE® DNA Isolation Kit, and  
207 the concentrations were quantified using the Invitrogen™  
208 Quant-iT™ PicoGreen™ dsDNA Assay Kit. More details can  
209 be found in the previous study[13]. Genotyping data were  
210 generated by the University of Wisconsin Biotechnology  
211 Center using the Illumina Multi-Ethnic Genotyping Array. In  
212 the WRAP genetic data, (1) duplicate samples were used to  
213 calculate a concordance rate of 99.99%, and discordant  
214 genotypes were set to missing; (2) samples missing  
215 genotypes for >5% of the single nucleotide polymorphisms  
216 (SNPs) were excluded, while SNPs missing in >5% of  
217 individuals were also excluded; (3) samples were excluded if  
218 the self-reported and genetic sex were inconsistent; (4) SNPs  
219 that were not in Hardy-Weinberg equilibrium (HWE;  
220  $p < 3.08E-8$ ) or were monomorphic were removed; (5)  
221 individuals that were not of European ancestry were  
222 removed due to small sample sizes of other ancestries; (6)  
223 the imputation was performed through the Michigan

224 Imputation Server v1.0.328, using the Haplotype Reference  
225 Consortium (HRC)[14–16] and the SNPs with a quality score  
226  $R^2 < 0.80$ , minor allele frequency (MAF)  $< 0.001$ , or that were  
227 out of HWE were excluded; (7) genetic ancestry was assessed  
228 by using Principal Components Analysis in Related Samples  
229 (PC-AiR) because of the sibling relationships present in the  
230 WRAP cohort[13].

231 Genetic data in the Wisconsin ADRC were generated  
232 from DNA extracted from blood samples at baseline and  
233 genotyped with either the Infinium OmniExpressExome-8  
234 Kit or the Infinium Global Screening Array-24 Kit. Genetic  
235 data for the Wisconsin ADRC underwent the same quality  
236 control (QC) and imputation as the WRAP data except  
237 samples and SNPs missing in  $> 2\%$  were excluded and HWE  
238 threshold was  $p < 1e-6$  due to differences in sample sizes and  
239 the number of SNPs between the two cohorts.

## 240 **2.5 Statistical analysis**

### 241 **2.5.1 Metabolome-wide association study**

242 A metabolome-wide association study (MWAS) was  
243 conducted in the WRAP cohort between 269 individual CSF  
244 metabolites and 13 CSF NTK biomarkers using linear mixed-  
245 effects regression models with random intercepts to account  
246 for repeated measures and family relationships (10 families  
247 with two or more siblings) and fixed effects for age at CSF

248 collection, sex, and years of education. Replication of each  
249 CSF metabolite significantly associated with one or more  
250 biomarkers in WRAP was then conducted in the Wisconsin  
251 ADRC cohort using linear regression adjusting for the same  
252 covariates. Both Bonferroni and false discovery rate (FDR)  
253 methods were used to correct the p-values for multiple  
254 testing; the FDR corrected q value was used to determine  
255 statistical significance in each analysis. Potential functional  
256 pathways of the replicated significant metabolites were  
257 identified by pathway analyses using the web-based software  
258 Metabo-analyst 5.0[17] based on the Kyoto Encyclopedia of  
259 Genes and Genomes (KEGG) Homo sapiens pathway. The  
260 hypergeometric test and relative-betweenness centrality  
261 were employed to evaluate the pathway importance, and the  
262 pathways were considered as important if the impact was  
263  $\geq 0.1$ .

### 264 **2.5.2 Prediction performance and elastic net** 265 **regression**

266 The variance for each biomarker explained by its  
267 corresponding significant metabolites was evaluated using  $r^2$   
268 in the combined cohorts of WRAP and the Wisconsin ADRC.  
269 For this analysis, we only included the first available  
270 measures of independent participants from WRAP. Since the  
271 number of significant metabolites for each biomarker was

272 large and some of the metabolites were highly correlated,  
273 elastic net regression[18] was employed to select the  
274 important independent metabolites. Then the  $r^2$  of elastic  
275 net-selected metabolites was re-calculated. For each  
276 biomarker, we fit three types of models, the (1) base model,  
277 which only included the demographics of age, sex, years of  
278 education, and cohort, (2) metabolite model, which included  
279 the demographics in the base model plus all the replicated  
280 significant metabolites, and (3) elastic net-selected  
281 metabolite model, which contained the demographics and  
282 elastic-net-selected metabolites.

### 283 **2.5.3 Mendelian randomization**

284 The genome-wide significant SNPs ( $p < 5 \times 10^{-8}$ )  
285 from a previous genome-wide meta-analysis of CSF  
286 metabolites[19] were extracted for each elastic net-selected  
287 metabolite (5863 SNPs for 52 metabolites). These SNPs (or  
288 the top 100 SNPs if there were more than 100 genome-wide  
289 significant SNPs for a metabolite) were used as instrumental  
290 variables (IV) for the metabolite in an MR analysis for each  
291 elastic net-selected metabolite-NTK biomarker association  
292 pair in the combined WRAP and Wisconsin ADRC cohort.  
293 For each MR test, we first checked the strength of the IVs  
294 using F statistics. Typically, an IV with an F statistic greater  
295 than 10 is considered to be strong, while instruments with F

296 statistics below 10 are considered to be weak[20]. Next, the  
297 estimated (or less confounded) beta and p values for the  
298 effect of the metabolite on the NTK biomarker were  
299 calculated using the two-stage least squares method if the  
300 IVs were strong, but using the limited information maximum  
301 likelihood (LIML) for IVs that were relatively weak. The  
302 confidence intervals (CI) of the point estimates from both  
303 LIML and another conditional likelihood ratio (CLR)  
304 method, which is robust to weak IVs[21], were compared and  
305 only significant results with CIs in the same direction and  
306 with a similar range of effect size between these two methods  
307 were considered as evidence of a causal effect. The  
308 Bonferroni corrected p-value < 0.05 based on the number of  
309 all MR tests performed was used to determine significance.  
310 The MR analysis was conducted using the R package  
311 "ivmodel"[22].

### 312 **3. Results**

#### 313 **3.1 Participant characteristics**

314 Characteristics of the WRAP and Wisconsin ADRC  
315 participants can be found in Table 1. Among 161 WRAP  
316 participants, the mean baseline age and education level were  
317 62.1 and 16.2 years, respectively. The mean age and years of  
318 education in the Wisconsin ADRC were 58.1 and 16.2,  
319 respectively. Females comprised 65.2% of WRAP

320 participants and 68.8% of the Wisconsin ADRC. The mean  
321 values of each biomarker are also listed in Table 1.

### 322 **3.2 MWAS**

323       The significant MWAS results in WRAP and the  
324 Wisconsin ADRC are summarized in Figure 1. In WRAP, a  
325 large number of CSF metabolites reached the significance  
326 threshold after FDR correction [Figure 1. (a)]. 47 metabolites  
327 were associated with P-tau, 56 were associated with T-tau,  
328 58 were associated with A $\beta$ <sub>42</sub>, 80 were associated with  
329 A $\beta$ <sub>40</sub>, 65 were associated with NfL, and 62 were associated  
330 with neurogranin. However, no metabolites were associated  
331 with the ratio of A $\beta$ <sub>42</sub>/40 or IL-6. Many of the metabolites  
332 that were significant in WRAP were also significant in the  
333 Wisconsin ADRC [Figure 1. (b)]. For example, among 47  
334 significant metabolites for P-tau in WRAP, 40 metabolites  
335 were also significant in the Wisconsin ADRC. Table 2 shows  
336 the replication results for the top 10 significant CSF  
337 metabolite-biomarker associations (if there were 10 or more  
338 significant metabolites) in the Wisconsin ADRC. For  
339 example, the top three metabolites associated with P-tau and  
340 T-tau were 1-palmitoyl-2-stearoyl-GPC (16:0/18:0), N-  
341 acetylneuraminate, and C-glycosyltryptophan. N-  
342 acetylneuraminate and 1,2-dipalmitoyl-GPC (16:0/16:0)  
343 were the top two metabolites associated with A $\beta$ <sub>42</sub> and A $\beta$ <sub>40</sub>.

344 The top three metabolites associated with NfL were N-  
345 acetylthreonine, N-acetylalanine, and beta-citrylglutamate.  
346 N-acetylneuraminate, C-glycosyltryptophan, and N6-  
347 succinyladenosine were the top three metabolites for  
348 neurogranin. N-acetylneuraminate, 1,2-dipalmitoyl-GPC  
349 (16:0/16:0), and stearyl sphingomyelin (d18:1/18:0) were  
350 the top three metabolites for YKL40. Stearyl sphingomyelin  
351 (d18:1/18:0), 1-stearoyl-2-docosahexaenoyl-GPC (18:0/22:6),  
352 and 1-palmitoyl-2-oleoyl-GPC (16:0/18:1) were the top three  
353 metabolites associated with S100b. Only six metabolites  
354 were associated with GFAP, and the top three were 1,2-  
355 dipalmitoyl-GPC (16:0/16:0), 1-palmitoyl-2-stearoyl-GPC  
356 (16:0/18:0), and beta-citrylglutamate. For sTREM2, the top  
357 metabolites were stearyl sphingomyelin (d18:1/18:0), 1,2-  
358 dipalmitoyl-GPC (16:0/16:0), and palmitoyl sphingomyelin  
359 (d18:1/16:0). Finally, for  $\alpha$ -synuclein, the top three  
360 metabolites were 1-palmitoyl-2-stearoyl-GPC (16:0/18:0),  
361 1,2-dipalmitoyl-GPC (16:0/16:0), and N-acetylneuraminate.  
362 The full results of WRAP and the Wisconsin ADRC can be  
363 found in Supplemental Tables 2-25. The association patterns  
364 between significant CSF metabolites and NTK biomarkers  
365 are provided in the Figure 2. The summary of the number of  
366 significant associations and the name of NTK biomarkers  
367 that were replicated in the Wisconsin ADRC are presented in



368 Supplemental Table 26. Most of the significant metabolites  
369 were lipids, amino acids, and carbohydrates. For example,  
370 the lipid, 1,2-dipalmitoyl-GPC (16:0/16:0), the amino acid,  
371 beta-citrylglutamate, and the carbohydrate N-  
372 acetylneuraminate were strongly associated with almost  
373 every CSF NTK biomarker of AD. On the contrary, amino  
374 acids like kynurenate and proline were only significantly  
375 associated with  $\alpha$ -synuclein.

376         The functional pathways for replicated significant  
377 metabolites with known human metabolome database  
378 (HMDB) IDs for each CSF NTK biomarker are shown in  
379 Supplemental Table 27. Two significant metabolites, 1,2-  
380 dipalmitoyl-GPC (16:0/16:0) and 1-oleoyl-GPC (18:1), were  
381 enriched in the glycerophospholipid metabolism pathway for  
382 most biomarkers. Other pathways such as pyrimidine  
383 metabolism (including orotate and orotidine), ascorbate and  
384 aldarate metabolism (including gulonate and glucuronate),  
385 arginine biosynthesis (including N-acetylglutamate and  
386 argininosuccinate), and pentose and glucuronate  
387 interconversions (also including gulonate and glucuronate)  
388 may also be of interest.

### 389 **3.3 Prediction performance and elastic net**

#### 390 **regression results**

391           The prediction performance of replicated significant  
392 metabolites was measured by  $r^2$  and presented in Table 3.  
393 The  $r^2$  of the base models, which only included the  
394 demographic variables, ranged from 0.01 to 0.25. Adding the  
395 replicated significant metabolites increased the  $r^2$   
396 substantially for each biomarker, ranging from 0.13 to 0.94.  
397 The elastic net regression further prioritized candidate  
398 metabolites associated with each biomarker. For example, 22  
399 of the original 40 significant metabolites were selected by the  
400 elastic net as important independent metabolites for P-tau.  
401 Initially, 40 significant metabolites explained about 72% of  
402 the variance in P-tau; the 22 elastic net-selected metabolites  
403 still explained 70% of the variance.

#### 404 **3.4 Mendelian randomization**

405           According to the F statistics, we employed the LIML  
406 method for MR. The full results of the test statistics are  
407 provided in Supplemental Table 28. After checking for  
408 consistency of the CIs for the LIML and CLR methods, the  
409 significant and consistent MR results are displayed in Table  
410 4, showing metabolites with a potential causal effect on the  
411 NTK biomarker based on instrumental variables formed by  
412 genome-wide significant SNPs. For example, we observed a  
413 positive causal association between palmitoyl sphingomyelin  
414 (d18:1/16:0) and sTREM2.

415 **4. Discussion**

416           In this analysis, we tested the associations between  
417 CSF metabolites and CSF NTK biomarkers representing  
418 different pathologies of AD in initially cognitively-  
419 unimpaired individuals. Significant metabolites were  
420 identified in the WRAP cohort using linear mixed effects  
421 regression and most of the metabolites were replicated in the  
422 Wisconsin ADRC cohort. The elastic net regression method  
423 reduced the number of CSF metabolites by selecting the  
424 important and independent metabolites for each CSF  
425 biomarker. This provides a smaller, more practical set of  
426 metabolites to focus on in future research. The results of the  
427 MR analyses suggested several metabolites that may play a  
428 causal role in AD pathology. A detailed look into these  
429 associations, such as the contributing genes and their  
430 corresponding functions, is worth exploring.

431           We have identified and replicated multiple CSF  
432 metabolites that were associated with CSF NTK biomarkers  
433 for AD pathology; most of these CSF metabolites were lipids,  
434 particularly sphingolipids, phosphatidylcholines, and  
435 lysophospholipids, which are all types of phospholipids.  
436 Phospholipids are a class of lipids that construct the cellular  
437 membranes and are involved in many complex activities of  
438 membrane proteins, receptors, enzymes, and ion channels in

439 the cell or at the cell surface[23]. In the neurodegenerative  
440 brain, *e.g.*, in the AD brain, which has suffered extensive  
441 damage, the compromise of the membrane functions is  
442 expected, explaining how phospholipids may be involved in  
443 AD pathology[24]. Previous studies have demonstrated that  
444 various phospholipids such as phosphatidylcholines,  
445 sphingolipids, glycerophospholipids, and lysophospholipids  
446 have changed in the AD patient's brain, CSF and blood when  
447 compared to healthy controls[23,25,26]. For example, a  
448 serum metabolomics study conducted by González-  
449 Domínguez *et al.*[25] showed that the concentration of  
450 numerous phosphatidyl lipids, like 1,2-dipalmitoyl-GPC  
451 (16:0/16:0), 1-palmitoyl-2-linoleoyl-GPC (16:0/18:2), and 1-  
452 palmitoyl-2-oleoyl-GPC (16:0/18:1), and  
453 lysophosphatidylcholines, like 1-palmitoyl-GPC (16:0) and 1-  
454 stearoyl-GPC (18:0), were different in AD versus healthy  
455 controls. The 1,2-dipalmitoyl-GPC (16:0/16:0)  
456 phosphatidylcholine has also been suggested as one of three  
457 serum metabolites to predict AD development in MCI  
458 individuals[27]. Another brain metabolomics study found  
459 that higher levels of palmitoyl sphingomyelin (d18:1/16:0)  
460 and sphingomyelin (d18:1/18:1, d18:2/18:0) were associated  
461 with the severity of AD pathology at autopsy and AD  
462 progression across prodromal and preclinical stages[28].

463 The stearyl sphingomyelin (d18:1/18:0) was also  
464 significantly changed in the CSF with “AD-like pathology”  
465 that was dichotomized by A $\beta$ 42, T-tau, and P-tau levels[6].  
466 In summary, our results confirmed the importance of the  
467 previously identified lipids but also provided novel lipid  
468 findings for AD pathologies beyond the major established  
469 ones.

470 Another class of metabolites that are of potential  
471 interest are several carbohydrates like N-acetylneuraminate,  
472 arabitol/xylitol, arabinose, and erythronate. Among them, N-  
473 acetylneuraminate, also known as sialic acid, had a  
474 significant effect on most NTK biomarkers. In addition to  
475 our study, a previous study conducted by Nagata *et al.*[29] in  
476 2018 also showed that CSF N-acetylneuraminate was  
477 significantly increased in AD when compared to patients  
478 with idiopathic normal pressure hydrocephalus and was  
479 positively correlated with CSF P-tau ( $r=0.55$ ), as it was in our  
480 study. N-acetylneuraminate is an acetyl derivative of the  
481 amino sugar neuraminic acid, which occurs in many  
482 glycoproteins, glycolipids, and polysaccharides. Specifically,  
483 it is a functional and structural component of gangliosides,  
484 which are found predominantly in the nervous system and  
485 are abundant in the brain, especially in the grey matter[30].  
486 Studies have shown that gangliosides play important roles in

487 AD. For example, it has been suggested that GM1-  
488 ganglioside binds to A $\beta$ , and the resulted GA $\beta$  has the  
489 capability to accelerate A $\beta$  assembly[31] and is the  
490 endogenous seed for amyloid fibril in the AD brain[32]. The  
491 gangliosides also have important roles in organizing the lipid  
492 rafts, which integrate numerous types of lipid proteins  
493 involved in cell signaling, cell-cell adhesion, and intracellular  
494 vesicular trafficking[29] and contain many AD-associated  
495 proteins such as amyloid precursor protein (APP)[33].  
496 Furthermore, the gene *CD33*, which belongs to the sialic-  
497 acid-binding immunoglobulin-like lectin family, has been  
498 reported as a strong genetic locus associated with AD by  
499 GWASs[34–36] and has been suggested to impair the  
500 microglia-mediated A $\beta$  clearance[37–39]. Erythronate  
501 (erythronic acid) was previously identified as the main  
502 hallmark of pentose–phosphate pathway defects[40], and  
503 consistent with abnormal function of pentose–phosphate  
504 pathway in certain regions of the AD-brain[41], and the  
505 upregulation of the pentose–phosphate pathway was  
506 reported in a previous study of mild cognitive impairment  
507 (MCI) participants that later progressed to AD[42].

508 As mentioned above, a couple of metabolites were  
509 common to most of the AD pathologies defined by the CSF  
510 NTK biomarkers. On the contrary, some metabolites were

511 unique to specific NTK biomarkers. For example, lipids like  
512 1-palmitoyl-2-linoleoyl-GPC (16:0/18:2), 1-stearoyl-2-  
513 arachidonoyl-GPC (18:0/20:4), sphingomyelin (d18:1/20:0,  
514 d16:1/22:0) and sphingomyelin (d18:1/22:1, d18:2/22:0,  
515 d16:1/24:1) were only associated with  $\alpha$ -synuclein. These  
516 metabolites may be helpful to study synaptic dysfunction and  
517 could potentially be used as biomarkers to differentiate AD  
518 pathologies.

519           By utilizing Mendelian randomization, we found  
520 causal evidence for several of the associations between CSF  
521 metabolites and CSF NTK biomarkers. Among these  
522 metabolites, most of them were lipids, with some amino  
523 acids and cofactors/vitamins, and a xenobiotic metabolite,  
524 erythritol. Another metabolite of interest, homocarnosine, is  
525 an inhibitory neuromodulator synthesized in the neuron  
526 from gamma-aminobutyric acid (GABA) and histidine[43].  
527 The level of human CSF homocarnosine declines drastically  
528 with age [44] and was suggested to be related to AD through  
529 CSF protein glycation[45]. At the same time, GABA also  
530 plays an important role in the brain and may be related to  
531 AD[46].

532           This study has some limitations. First, the analysis  
533 only included non-Hispanic white individuals, so the results  
534 may not extrapolate to other racial/ethnic groups. Second,

535 the sample sizes of both the WRAP and Wisconsin ADRC  
536 cohorts were relatively small and will need to be replicated in  
537 a larger independent sample. The significant associations  
538 between a number of metabolites and both A $\beta$ <sub>42</sub> and A $\beta$ <sub>40</sub>,  
539 but not with A $\beta$ <sub>42/40</sub> may indicate that the metabolites  
540 associated with A $\beta$ <sub>42</sub> and A $\beta$ <sub>40</sub> only influence the  
541 production of amyloid in general versus clearance of the  
542 pathological form, A $\beta$ <sub>42</sub>. In general, the research confirmed  
543 that several novel metabolites changed along with AD CSF  
544 biomarkers and extended several developing and  
545 understudied AD pathologies, e.g., synaptic dysfunction,  
546 based on untargeted CSF metabolomics and will expand our  
547 knowledge of the biological mechanisms behind AD.

#### 548 **Acknowledgments**

549 The authors especially thank the WRAP and  
550 Wisconsin ADRC participants and staff for their  
551 contributions to the studies. Without their efforts, this  
552 research would not be possible. This study was supported by  
553 the National Institutes of Health (NIH) grants [R01AG27161  
554 (Wisconsin Registry for Alzheimer Prevention: Biomarkers  
555 of Preclinical AD), R01AG054047 (Genomic and  
556 Metabolomic Data Integration in a Longitudinal Cohort at  
557 Risk for Alzheimer's Disease), R01AG037639 (White Matter  
558 Degeneration: Biomarkers in Preclinical Alzheimer's



559 Disease), R21AGO67092 (Identifying Metabolomic Risk  
560 Factors in Plasma and Cerebrospinal Fluid for Alzheimer's  
561 Disease), and P30AGO62715 (Wisconsin Alzheimer's Disease  
562 Research Center Grant)], the Helen Bader Foundation,  
563 Northwestern Mutual Foundation, Extencicare Foundation,  
564 State of Wisconsin, the Clinical and Translational Science  
565 Award (CTSA) program through the NIH National Center for  
566 Advancing Translational Sciences (NCATS) grant  
567 [UL1TR000427], and the University of Wisconsin-Madison  
568 Office of the Vice Chancellor for Research and Graduate  
569 Education with funding from the Wisconsin Alumni  
570 Research Foundation. Computational resources were  
571 supported by core grants to the Center for Demography and  
572 Ecology [P2CHDo47873] and the Center for Demography of  
573 Health and Aging [P30AGO17266].

574 HZ is a Wallenberg Scholar supported by grants from  
575 the Swedish Research Council (#2018-02532), the European  
576 Research Council (#681712), Swedish State Support for  
577 Clinical Research (#ALFGBG-720931), the Alzheimer Drug  
578 Discovery Foundation (ADDF), USA (#201809-2016862),  
579 the AD Strategic Fund and the Alzheimer's Association  
580 (#ADSF-21-831376-C, #ADSF-21-831381-C and #ADSF-21-  
581 831377-C), the Olav Thon Foundation, the Erling-Persson  
582 Family Foundation, Stiftelsen för Gamla Tjänarinnor,

583 Hjärnfonden, Sweden (#FO2019-0228), the European  
584 Union's Horizon 2020 research and innovation programme  
585 under the Marie Skłodowska-Curie grant agreement No  
586 860197 (MIRIADE), European Union Joint Program for  
587 Neurodegenerative Disorders (JPND2021-00694), and the  
588 UK Dementia Research Institute at UCL.

589 KB is supported by the Swedish Research Council  
590 (#2017-00915), ADDF, USA [#RDAPB-201809-2016615],  
591 the Swedish Alzheimer Foundation [#AF-742881],  
592 Hjärnfonden, Sweden [#FO2017-0243], the Swedish state  
593 under the agreement between the Swedish government and  
594 the County Councils, the ALF-agreement [#ALFGBG-  
595 715986], and European Union Joint Program for  
596 Neurodegenerative Disorders [JPND2019-466-236], and the  
597 Alzheimer's Association 2021 Zenith Award (ZEN-21-  
598 848495).

599 We thank the University of Wisconsin Madison  
600 Biotechnology Center Gene Expression Center for providing  
601 Illumina Infinium genotyping services and Roche for  
602 providing the NTK kits for this study. COBAS, COBAS E and  
603 ELECSYS are trademarks of Roche.

#### 604 **Conflicts of Interest**

605 HZ has served at scientific advisory boards and/or as  
606 a consultant for Abbvie, Alector, Annexon, Artery

607 Therapeutics, AZTherapies, CogRx, Denali, Eisai, Nervgen,  
608 Pinteon Therapeutics, Red Abbey Labs, Passage Bio, Roche,  
609 Samumed, Siemens Healthineers, Triplet Therapeutics, and  
610 Wave, has given lectures in symposia sponsored by  
611 Cellectricon, Fujirebio, Alzecure, Biogen, and Roche, and is a  
612 co-founder of Brain Biomarker Solutions in Gothenburg AB  
613 (BBS), which is a part of the GU Ventures Incubator Program  
614 (outside submitted work).

615 KB has served as a consultant, at advisory boards, or  
616 at data monitoring committees for Abcam, Axon, Biogen,  
617 JOMDD/Shimadzu. Julius Clinical, Lilly, MagQu, Novartis,  
618 Pharmatrophix, Prothena, Roche Diagnostics, and Siemens  
619 Healthineers, and is a co-founder of Brain Biomarker  
620 Solutions in Gothenburg AB (BBS), which is a part of the GU  
621 Ventures Incubator Program, all unrelated to the work  
622 presented in this paper.

623 Gwendlyn Kollmorgen and Norbert Wild are full-time  
624 employees of Roche Diagnostics GmbH. Ivonne Suridjan is a  
625 full-time employee of Roche Diagnostics International Ltd  
626 and holds non-voting equities in F. Hoffmann-La Roche.

627 **Reference**

- 628 [1] Anoop A, Singh PK, Jacob RS, Maji SK. CSF Biomarkers  
629 for Alzheimer's Disease Diagnosis. *Int J Alzheimers Dis*  
630 2010;2010. <https://doi.org/10.4061/2010/606802>.
- 631 [2] Blennow K, Zetterberg H, Fagan AM. Fluid Biomarkers  
632 in Alzheimer Disease. *Cold Spring Harb Perspect Med*  
633 2012;2:a006221–a006221.  
634 <https://doi.org/10.1101/cshperspect.a006221>.
- 635 [3] Hulle CV, Jonaitis EM, Betthausen TJ, Batrla R, Wild N,  
636 Kollmorgen G, et al. An examination of a novel  
637 multipanel of CSF biomarkers in the Alzheimer's  
638 disease clinical and pathological continuum. *Alzheimers*  
639 *Dement* 2021;17:431–45.  
640 <https://doi.org/10.1002/alz.12204>.
- 641 [4] Fluid AD Biomarkers Link P-Tau to Synapses,  
642 Inflammation | ALZFORUM n.d.  
643 [https://www.alzforum.org/news/conference-](https://www.alzforum.org/news/conference-coverage/fluid-ad-biomarkers-link-p-tau-synapses-inflammation)  
644 [coverage/fluid-ad-biomarkers-link-p-tau-synapses-](https://www.alzforum.org/news/conference-coverage/fluid-ad-biomarkers-link-p-tau-synapses-inflammation)  
645 [inflammation](https://www.alzforum.org/news/conference-coverage/fluid-ad-biomarkers-link-p-tau-synapses-inflammation) (accessed June 5, 2021).
- 646 [5] Hasin Y, Seldin M, Lusic A. Multi-omics approaches to  
647 disease. *Genome Biol* 2017;18:83.  
648 <https://doi.org/10.1186/s13059-017-1215-1>.
- 649 [6] Koal T, Klavins K, Seppi D, Kemmler G, Humpel C.  
650 Sphingomyelin SM(d18:1/18:0) is Significantly

- 651           Enhanced in Cerebrospinal Fluid Samples  
652           Dichotomized by Pathological Amyloid- $\beta$  42, Tau, and  
653           Phospho-Tau-181 Levels. *J Alzheimers Dis*  
654           2015;44:1193–201. [https://doi.org/10.3233/JAD-](https://doi.org/10.3233/JAD-142319)  
655           142319.
- 656 [7] Johnson SC, Kosciak RL, Jonaitis EM, Clark LR, Mueller  
657           KD, Berman SE, et al. The Wisconsin Registry for  
658           Alzheimer’s Prevention: A review of findings and  
659           current directions. *Alzheimers Dement Diagn Assess*  
660           *Dis Monit* 2018;10:130–42.  
661           <https://doi.org/10.1016/j.dadm.2017.11.007>.
- 662 [8] Bettcher BM, Johnson SC, Fitch R, Casaletto KB,  
663           Heffernan KS, Asthana S, et al. Cerebrospinal Fluid and  
664           Plasma Levels of Inflammation Differentially Relate to  
665           CNS Markers of Alzheimer’s Disease Pathology and  
666           Neuronal Damage. *J Alzheimers Dis* 2018;62:385–97.  
667           <https://doi.org/10.3233/JAD-170602>.
- 668 [9] Darst BF, Kosciak RL, Racine AM, Oh JM, Krause RA,  
669           Carlsson CM, et al. Pathway-specific polygenic risk  
670           scores as predictors of  $\beta$ -amyloid deposition and  
671           cognitive function in a sample at increased risk for  
672           Alzheimer’s disease. *J Alzheimers Dis JAD*  
673           2017;55:473–84. <https://doi.org/10.3233/JAD-160195>.

- 674 [10] Racine AM, Kosciak RL, Berman SE, Nicholas CR, Clark  
675 LR, Okonkwo OC, et al. Biomarker clusters are  
676 differentially associated with longitudinal cognitive  
677 decline in late midlife. *Brain* 2016;139:2261–74.  
678 <https://doi.org/10.1093/brain/aww142>.
- 679 [11] Vogt NM, Romano KA, Darst BF, Engelman CD,  
680 Johnson SC, Carlsson CM, et al. The gut microbiota-  
681 derived metabolite trimethylamine N-oxide is elevated  
682 in Alzheimer’s disease. *Alzheimers Res Ther*  
683 2018;10:124. [https://doi.org/10.1186/s13195-018-0451-](https://doi.org/10.1186/s13195-018-0451-2)  
684 2.
- 685 [12] Bridgewater BR EA. High Resolution Mass  
686 Spectrometry Improves Data Quantity and Quality as  
687 Compared to Unit Mass Resolution Mass Spectrometry  
688 in High-Throughput Profiling Metabolomics. *J*  
689 *Postgenomics Drug Biomark Dev* 2014;04.  
690 <https://doi.org/10.4172/2153-0769.1000132>.
- 691 [13] Darst BF, Lu Q, Johnson SC, Engelman CD. Integrated  
692 analysis of genomics, longitudinal metabolomics, and  
693 Alzheimer’s risk factors among 1,111 cohort participants.  
694 *Genet Epidemiol* 2019;43:657–74.  
695 <https://doi.org/10.1002/gepi.22211>.
- 696 [14] Das S, Forer L, Schönherr S, Sidore C, Locke AE, Kwong  
697 A, et al. Next-generation genotype imputation service

- 698 and methods. *Nat Genet* 2016;48:1284–7.
- 699 <https://doi.org/10.1038/ng.3656>.
- 700 [15] Loh P-R, Danecek P, Palamara PF, Fuchsberger C, A  
701 Reshef Y, K Finucane H, et al. Reference-based phasing  
702 using the Haplotype Reference Consortium panel. *Nat*  
703 *Genet* 2016;48:1443–8.  
704 <https://doi.org/10.1038/ng.3679>.
- 705 [16] McCarthy S, Das S, Kretzschmar W, Delaneau O, Wood  
706 AR, Teumer A, et al. A reference panel of 64,976  
707 haplotypes for genotype imputation. *Nat Genet*  
708 2016;48:1279–83. <https://doi.org/10.1038/ng.3643>.
- 709 [17] Pang Z, Chong J, Zhou G, de Lima Morais DA, Chang L,  
710 Barrette M, et al. MetaboAnalyst 5.0: narrowing the gap  
711 between raw spectra and functional insights. *Nucleic*  
712 *Acids Res* 2021;49:W388–96.  
713 <https://doi.org/10.1093/nar/gkab382>.
- 714 [18] Zou H, Hastie T. Regularization and variable selection  
715 via the elastic net. *J R Stat Soc Ser B Stat Methodol*  
716 2005;67:301–20. [https://doi.org/10.1111/j.1467-](https://doi.org/10.1111/j.1467-9868.2005.00503.x)  
717 [9868.2005.00503.x](https://doi.org/10.1111/j.1467-9868.2005.00503.x).
- 718 [19] Panyard DJ, Kim KM, Darst BF, Deming YK, Zhong X,  
719 Wu Y, et al. Cerebrospinal fluid metabolomics identifies  
720 19 brain-related phenotype associations. *Commun Biol*

- 721           2021;4:1–11. <https://doi.org/10.1038/s42003-020->  
722           01583-z.
- 723 [20] Stock JH, Wright JH, Yogo M. A Survey of Weak  
724           Instruments and Weak Identification in Generalized  
725           Method of Moments. *J Bus Econ Stat* 2002;20:518–29.  
726           <https://doi.org/10.1198/073500102288618658>.
- 727 [21] Moreira MJ. A Conditional Likelihood Ratio Test for  
728           Structural Models. *Econometrica* 2003;71:1027–48.  
729           <https://doi.org/10.1111/1468-0262.00438>.
- 730 [22] Kang H, Jiang Y, Zhao Q, Small DS. ivmodel: An R  
731           Package for Inference and Sensitivity Analysis of  
732           Instrumental Variables Models with One Endogenous  
733           Variable. *ArXiv200208457 Stat* 2020.
- 734 [23] Kosicek M, Hecimovic S. Phospholipids and Alzheimer’s  
735           Disease: Alterations, Mechanisms and Potential  
736           Biomarkers. *Int J Mol Sci* 2013;14:1310–22.  
737           <https://doi.org/10.3390/ijms14011310>.
- 738 [24] Wong MW, Braidy N, Poljak A, Pickford R, Thambisetty  
739           M, Sachdev PS. Dysregulation of lipids in Alzheimer’s  
740           disease and their role as potential biomarkers.  
741           *Alzheimers Dement* 2017;13:810–27.  
742           <https://doi.org/10.1016/j.jalz.2017.01.008>.
- 743 [25] González-Domínguez R, García-Barrera T, Gómez-Ariza  
744           JL. Combination of metabolomic and phospholipid-



- 745            profiling approaches for the study of Alzheimer's  
746            disease. *J Proteomics* 2014;104:37–47.  
747            <https://doi.org/10.1016/j.jprot.2014.01.014>.
- 748 [26] Kao Y-C, Ho P-C, Tu Y-K, Jou I-M, Tsai K-J. Lipids and  
749            Alzheimer's Disease. *Int J Mol Sci* 2020;21:1505.  
750            <https://doi.org/10.3390/ijms21041505>.
- 751 [27] Orešič M, Hyötyläinen T, Herukka S-K, Sysi-Aho M,  
752            Mattila I, Seppänen-Laakso T, et al. Metabolome in  
753            progression to Alzheimer's disease. *Transl Psychiatry*  
754            2011;1:e57–e57. <https://doi.org/10.1038/tp.2011.55>.
- 755 [28] Varma VR, Oommen AM, Varma S, Casanova R, An Y,  
756            Andrews RM, et al. Brain and blood metabolite  
757            signatures of pathology and progression in Alzheimer  
758            disease: A targeted metabolomics study. *PLOS Med*  
759            2018;15:e1002482.  
760            <https://doi.org/10.1371/journal.pmed.1002482>.
- 761 [29] Nagata Y, Hirayama A, Ikeda S, Shirahata A, Shoji F,  
762            Maruyama M, et al. Comparative analysis of  
763            cerebrospinal fluid metabolites in Alzheimer's disease  
764            and idiopathic normal pressure hydrocephalus in a  
765            Japanese cohort. *Biomark Res* 2018;6:5.  
766            <https://doi.org/10.1186/s40364-018-0119-x>.
- 767 [30] Palmano K, Rowan A, Guillermo R, Guan J, Mc Jarrow  
768            P. The Role of Gangliosides in Neurodevelopment.

- 769           Nutrients 2015;7:3891–913.  
770           <https://doi.org/10.3390/nu7053891>.
- 771   [31] Yanagisawa K, Odaka A, Suzuki N, Ihara Y. GM1  
772           ganglioside-bound amyloid  $\beta$ -protein ( $A\beta$ ): A possible  
773           form of preamyloid in Alzheimer's disease. Nat Med  
774           1995;1:1062–6. <https://doi.org/10.1038/nm1095-1062>.
- 775   [32] Hayashi H, Kimura N, Yamaguchi H, Hasegawa K,  
776           Yokoseki T, Shibata M, et al. A Seed for Alzheimer  
777           Amyloid in the Brain. J Neurosci 2004;24:4894–902.  
778           <https://doi.org/10.1523/JNEUROSCI.0861-04.2004>.
- 779   [33] Eehalt R, Keller P, Haass C, Thiele C, Simons K.  
780           Amyloidogenic processing of the Alzheimer  $\beta$ -amyloid  
781           precursor protein depends on lipid rafts. J Cell Biol  
782           2003;160:113–23.  
783           <https://doi.org/10.1083/jcb.200207113>.
- 784   [34] Bertram L, Lange C, Mullin K, Parkinson M, Hsiao M,  
785           Hogan MF, et al. Genome-wide Association Analysis  
786           Reveals Putative Alzheimer's Disease Susceptibility Loci  
787           in Addition to APOE. Am J Hum Genet 2008;83:623–  
788           32. <https://doi.org/10.1016/j.ajhg.2008.10.008>.
- 789   [35] Hollingworth P, Harold D, Sims R, Gerrish A, Lambert  
790           J-C, Carrasquillo MM, et al. Common variants at  
791           ABCA7, MS4A6A/MS4A4E, EPHA1, CD33 and CD2AP

- 792 are associated with Alzheimer's disease. *Nat Genet*  
793 2011;43:429–35. <https://doi.org/10.1038/ng.803>.
- 794 [36] Naj AC, Jun G, Beecham GW, Wang L-S, Vardarajan  
795 BN, Buross J, et al. Common variants at  
796 MS4A4/MS4A6E, CD2AP, CD33 and EPHA1 are  
797 associated with late-onset Alzheimer's disease. *Nat*  
798 *Genet* 2011;43:436–41. <https://doi.org/10.1038/ng.801>.
- 799 [37] Bradshaw EM, Chibnik LB, Keenan BT, Ottoboni L, Raj  
800 T, Tang A, et al. CD33 Alzheimer's disease locus: altered  
801 monocyte function and amyloid biology. *Nat Neurosci*  
802 2013;16:848–50. <https://doi.org/10.1038/nn.3435>.
- 803 [38] Jiang T, Yu J-T, Hu N, Tan M-S, Zhu X-C, Tan L. CD33  
804 in Alzheimer's Disease. *Mol Neurobiol* 2014;49:529–35.  
805 <https://doi.org/10.1007/s12035-013-8536-1>.
- 806 [39] Griciuc A, Serrano-Pozo A, Parrado AR, Lesinski AN,  
807 Asselin CN, Mullin K, et al. Alzheimer's Disease Risk  
808 Gene CD33 Inhibits Microglial Uptake of Amyloid Beta.  
809 *Neuron* 2013;78:631–43.  
810 <https://doi.org/10.1016/j.neuron.2013.04.014>.
- 811 [40] Engelke UFH, Zijlstra FSM, Mochel F, Valayannopoulos  
812 V, Rabier D, Kluijtmans LAJ, et al. Mitochondrial  
813 involvement and erythronic acid as a novel biomarker in  
814 transaldolase deficiency. *Biochim Biophys Acta BBA -*

- 815 Mol Basis Dis 2010;1802:1028–35.  
816 <https://doi.org/10.1016/j.bbadis.2010.06.007>.
- 817 [41] Xu J, Begley P, Church SJ, Patassini S, Hollywood KA,  
818 Jüllig M, et al. Graded perturbations of metabolism in  
819 multiple regions of human brain in Alzheimer’s disease:  
820 Snapshot of a pervasive metabolic disorder. Biochim  
821 Biophys Acta BBA - Mol Basis Dis 2016;1862:1084–92.  
822 <https://doi.org/10.1016/j.bbadis.2016.03.001>.
- 823 [42] Orešič M, Hyötyläinen T, Herukka S-K, Sysi-Aho M,  
824 Mattila I, Seppänen-Laakso T, et al. Metabolome in  
825 progression to Alzheimer’s disease. Transl Psychiatry  
826 2011;1:e57–e57. <https://doi.org/10.1038/tp.2011.55>.
- 827 [43] Gujar SK, Maheshwari S, Björkman-Burtscher I,  
828 Sundgren PC. Magnetic Resonance Spectroscopy. J  
829 Neuroophthalmol 2005;25:217–26.  
830 <https://doi.org/10.1097/O1.WNO.0000177307.21081.81>.
- 831 [44] Jansen EEW, Gibson KM, Shigematsu Y, Jakobs C,  
832 Verhoeven NM. A novel, quantitative assay for  
833 homocarnosine in cerebrospinal fluid using stable-  
834 isotope dilution liquid chromatography–tandem mass  
835 spectrometry. J Chromatogr B 2006;830:196–200.  
836 <https://doi.org/10.1016/j.jchromb.2005.10.053>.
- 837 [45] Hipkiss AR. Could Carnosine or Related Structures  
838 Suppress Alzheimer’s Disease? J Alzheimers Dis

839           2007;11:229–40. <https://doi.org/10.3233/JAD-2007->  
840           11210.

841 [46] Govindpani K, Calvo-Flores Guzmán B, Vinnakota C,  
842           Waldvogel HJ, Faull RL, Kwakowsky A. Towards a  
843           Better Understanding of GABAergic Remodeling in  
844           Alzheimer’s Disease. *Int J Mol Sci* 2017;18:1813.  
845           <https://doi.org/10.3390/ijms18081813>.

846

847 **Table 1. Sample characteristics of WRAP and Wisconsin**

848 **ADRC participants.**

|                           | <b>WRAP*</b> |           | <b>Wisconsin</b> |           |
|---------------------------|--------------|-----------|------------------|-----------|
|                           | <b>N=161</b> |           | <b>ADRC</b>      |           |
|                           | <b>Mean</b>  | <b>SD</b> | <b>Mean</b>      | <b>SD</b> |
| <b>Age</b>                | 62.1         | 6.5       | 58.1             | 5.5       |
| <b>Years of education</b> | 16.2         | 2.2       | 16.2             | 2.3       |
| <b>P-tau</b>              | 17.5         | 6.4       | 15.9             | 5.8       |
| <b>T-tau</b>              | 200.6        | 67.3      | 184.5            | 69.3      |
| <b>Aβ42</b>               | 895.4        | 369.4     | 942.6            | 363.1     |
| <b>Aβ40</b>               | 14336.1      | 4497.9    | 13897.4          | 4742.3    |
| <b>NfL</b>                | 87.2         | 38.0      | 83.3             | 80.7      |
| <b>Neurogranin</b>        | 798.6        | 307.5     | 728.2            | 286.7     |
| <b>YKL-40</b>             | 144.6        | 48.3      | 128.7            | 39.1      |
| <b>S100b</b>              | 1.1          | 0.3       | 1.2              | 0.3       |
| <b>GFAP</b>               | 8.6          | 2.9       | 8.6              | 3.3       |
| <b>sTREM2</b>             | 7.9          | 2.4       | 7.6              | 2.1       |
| <b>IL-6</b>               | 4.3          | 2.6       | 5.2              | 3.7       |
| <b>α-synuclein</b>        | 157.4        | 65.1      | 146.2            | 64.1      |
|                           | <b>N</b>     | <b>%</b>  | <b>N</b>         | <b>%</b>  |
| <b>Female</b>             | 105          | 65.2      | 106              | 68.8      |
| <b>Male</b>               | 56           | 34.8      | 48               | 31.2      |

849 \* The summary statistics of WRAP were based on the baseline

850 measures.

851 **Table 2. Top 10 significant CSF metabolites associated with each NTK biomarker in WRAP and replicated in the**  
 852 **Wisconsin ADRC.**

| NTK Biomarker | Biochemical names                      | Compound ID | Beta   | P        | Adjusted P | FDR q    | Super pathway | Sub-pathway                              |
|---------------|----------------------------------------|-------------|--------|----------|------------|----------|---------------|------------------------------------------|
| <b>P-tau</b>  | 1-palmitoyl-2-stearoyl-GPC (16:0/18:0) | 52616       | 24.10  | 9.89E-23 | 4.65E-21   | 4.65E-21 | Lipid         | Phosphatidylcholine (PC)                 |
|               | N-acetylneuramate                      | 32377       | 29.31  | 2.66E-21 | 1.25E-19   | 6.25E-20 | Carbohydrate  | Aminosugar Metabolism                    |
|               | C-glycosyltryptophan                   | 48782       | 29.26  | 1.41E-20 | 6.62E-19   | 2.21E-19 | Amino Acid    | Tryptophan Metabolism                    |
|               | 1,2-dipalmitoyl-GPC (16:0/16:0)        | 19130       | 27.21  | 6.95E-16 | 3.27E-14   | 8.17E-15 | Lipid         | Phosphatidylcholine (PC)                 |
|               | stearoyl sphingomyelin (d18:1/18:0)    | 19503       | 26.20  | 9.38E-16 | 4.41E-14   | 8.81E-15 | Lipid         | Sphingolipid Metabolism                  |
|               | arabitol/xylitol                       | 48885       | 28.10  | 1.50E-15 | 7.04E-14   | 1.17E-14 | Carbohydrate  | Pentose Metabolism                       |
|               | beta-citrylglutamate                   | 54923       | 23.47  | 9.84E-15 | 4.62E-13   | 5.82E-14 | Amino Acid    | Glutamate Metabolism                     |
|               | N-acetylserine                         | 37076       | 35.24  | 9.90E-15 | 4.65E-13   | 5.82E-14 | Amino Acid    | Glycine, Serine and Threonine Metabolism |
|               | sphingomyelin (d18:1/18:1, d18:2/18:0) | 37529       | 24.14  | 4.10E-14 | 1.93E-12   | 2.09E-13 | Lipid         | Sphingolipid Metabolism                  |
|               | N6-succinyladenosine                   | 48130       | 22.14  | 4.44E-14 | 2.09E-12   | 2.09E-13 | Nucleotide    | Purine Metabolism, Adenine containing    |
| <b>T-tau</b>  | N-acetylneuramate                      | 32377       | 349.51 | 2.25E-21 | 1.26E-19   | 1.26E-19 | Carbohydrate  | Aminosugar Metabolism                    |
|               | 1-palmitoyl-2-stearoyl-GPC (16:0/18:0) | 52616       | 296.17 | 1.53E-19 | 8.54E-18   | 4.27E-18 | Lipid         | Phosphatidylcholine (PC)                 |
|               | C-glycosyltryptophan                   | 48782       | 336.75 | 7.77E-19 | 4.35E-17   | 1.45E-17 | Amino Acid    | Tryptophan Metabolism                    |
|               | 1,2-dipalmitoyl-GPC (16:0/16:0)        | 19130       | 343.88 | 3.72E-18 | 2.09E-16   | 5.21E-17 | Lipid         | Phosphatidylcholine (PC)                 |
|               | N-acetylthreonine                      | 33939       | 372.61 | 1.37E-17 | 7.68E-16   | 1.54E-16 | Amino Acid    | Glycine, Serine and Threonine            |

|             |                                                |       |          |          |          |          |              |                                             |
|-------------|------------------------------------------------|-------|----------|----------|----------|----------|--------------|---------------------------------------------|
|             |                                                |       |          |          |          |          |              | Metabolism                                  |
|             | arabitol/xylitol                               | 48885 | 340.87   | 1.61E-16 | 9.00E-15 | 1.50E-15 | Carbohydrate | Pentose Metabolism                          |
|             | stearoyl sphingomyelin<br>(d18:1/18:0)         | 19503 | 314.01   | 6.07E-16 | 3.40E-14 | 4.85E-15 | Lipid        | Sphingolipid Metabolism                     |
|             | N6-succinyladenosine                           | 48130 | 275.91   | 1.19E-15 | 6.64E-14 | 8.30E-15 | Nucleotide   | Purine Metabolism, Adenine containing       |
|             | erythronate*                                   | 42420 | 608.03   | 1.48E-15 | 8.30E-14 | 9.23E-15 | Carbohydrate | Aminosugar Metabolism                       |
|             | beta-citrylglutamate                           | 54923 | 281.29   | 6.24E-15 | 3.49E-13 | 3.49E-14 | Amino Acid   | Glutamate Metabolism                        |
| <b>Aβ42</b> | N-acetylneuraminate                            | 32377 | 1831.96  | 7.62E-20 | 4.42E-18 | 2.65E-18 | Carbohydrate | Aminosugar Metabolism                       |
|             | 1,2-dipalmitoyl-GPC (16:0/16:0)                | 19130 | 1922.65  | 9.15E-20 | 5.31E-18 | 2.65E-18 | Lipid        | Phosphatidylcholine (PC)                    |
|             | 1-palmitoyl-2-oleoyl-GPC<br>(16:0/18:1)        | 52461 | 2019.63  | 4.04E-19 | 2.34E-17 | 7.50E-18 | Lipid        | Phosphatidylcholine (PC)                    |
|             | 1-palmitoyl-2-stearoyl-GPC<br>(16:0/18:0)      | 52616 | 1608.22  | 5.17E-19 | 3.00E-17 | 7.50E-18 | Lipid        | Phosphatidylcholine (PC)                    |
|             | 1-myristoyl-2-palmitoyl-GPC<br>(14:0/16:0)     | 19258 | 1779.94  | 5.29E-18 | 3.07E-16 | 6.13E-17 | Lipid        | Phosphatidylcholine (PC)                    |
|             | stearoyl sphingomyelin<br>(d18:1/18:0)         | 19503 | 1735.41  | 7.98E-17 | 4.63E-15 | 7.72E-16 | Lipid        | Sphingolipid Metabolism                     |
|             | N-acetylserine                                 | 37076 | 2220.93  | 1.96E-15 | 1.14E-13 | 1.63E-14 | Amino Acid   | Glycine, Serine and Threonine<br>Metabolism |
|             | arabitol/xylitol                               | 48885 | 1732.68  | 2.00E-14 | 1.16E-12 | 1.45E-13 | Carbohydrate | Pentose Metabolism                          |
|             | N-acetylthreonine                              | 33939 | 1832.87  | 3.07E-14 | 1.78E-12 | 1.98E-13 | Amino Acid   | Glycine, Serine and Threonine<br>Metabolism |
| <b>Aβ40</b> | 1-palmitoyl-2-palmitoleoyl-GPC<br>(16:0/16:1)* | 52470 | 1793.19  | 3.46E-14 | 2.01E-12 | 2.01E-13 | Lipid        | Phosphatidylcholine (PC)                    |
|             | N-acetylneuraminate                            | 32377 | 27190.93 | 2.92E-30 | 2.34E-28 | 2.34E-28 | Carbohydrate | Aminosugar Metabolism                       |



|            |                                            |       |          |          |          |          |              |                                             |
|------------|--------------------------------------------|-------|----------|----------|----------|----------|--------------|---------------------------------------------|
|            | 1,2-dipalmitoyl-GPC (16:0/16:0)            | 19130 | 27204.24 | 2.46E-26 | 1.96E-24 | 9.51E-25 | Lipid        | Phosphatidylcholine (PC)                    |
|            | 1-palmitoyl-2-stearoyl-GPC<br>(16:0/18:0)  | 52616 | 23086.44 | 3.57E-26 | 2.85E-24 | 9.51E-25 | Lipid        | Phosphatidylcholine (PC)                    |
|            | 1-stearoyl-2-oleoyl-GPC<br>(18:0/18:1)     | 52438 | 27203.88 | 1.22E-23 | 9.72E-22 | 2.43E-22 | Lipid        | Phosphatidylcholine (PC)                    |
|            | 1-palmitoyl-2-oleoyl-GPC<br>(16:0/18:1)    | 52461 | 27594.67 | 4.59E-23 | 3.67E-21 | 7.35E-22 | Lipid        | Phosphatidylcholine (PC)                    |
|            | N-acetylserine                             | 37076 | 34639.61 | 5.99E-23 | 4.79E-21 | 7.99E-22 | Amino Acid   | Glycine, Serine and Threonine<br>Metabolism |
|            | stearoyl sphingomyelin<br>(d18:1/18:0)     | 19503 | 24933.03 | 8.41E-23 | 6.73E-21 | 9.61E-22 | Lipid        | Sphingolipid Metabolism                     |
|            | arabitol/xylitol                           | 48885 | 26504.66 | 6.06E-22 | 4.85E-20 | 5.64E-21 | Carbohydrate | Pentose Metabolism                          |
|            | 1-myristoyl-2-palmitoyl-GPC<br>(14:0/16:0) | 19258 | 24513.57 | 6.34E-22 | 5.07E-20 | 5.64E-21 | Lipid        | Phosphatidylcholine (PC)                    |
|            | erythronate*                               | 42420 | 47037.89 | 2.43E-20 | 1.94E-18 | 1.94E-19 | Carbohydrate | Aminosugar Metabolism                       |
| <b>nfl</b> | N-acetylthreonine                          | 33939 | 194.81   | 4.51E-04 | 2.93E-02 | 2.09E-02 | Amino Acid   | Glycine, Serine and Threonine<br>Metabolism |
|            | N-acetylalanine                            | 1585  | 262.23   | 9.53E-04 | 6.19E-02 | 2.09E-02 | Amino Acid   | Alanine and Aspartate Metabolism            |
|            | beta-citrylglutamate                       | 54923 | 150.23   | 9.66E-04 | 6.28E-02 | 2.09E-02 | Amino Acid   | Glutamate Metabolism                        |
|            | arabitol/xylitol                           | 48885 | 165.78   | 1.70E-03 | 1.10E-01 | 2.26E-02 | Carbohydrate | Pentose Metabolism                          |
|            | 1-palmitoyl-GPC (16:0)                     | 33955 | 142.17   | 1.74E-03 | 1.13E-01 | 2.26E-02 | Lipid        | Lysophospholipid                            |
|            | 1,2-dipalmitoyl-GPC (16:0/16:0)            | 19130 | 154.06   | 2.68E-03 | 1.74E-01 | 2.53E-02 | Lipid        | Phosphatidylcholine (PC)                    |
|            | 1-oleoyl-GPC (18:1)                        | 48258 | 136.99   | 2.72E-03 | 1.77E-01 | 2.53E-02 | Lipid        | Lysophospholipid                            |
|            | stearoyl sphingomyelin<br>(d18:1/18:0)     | 19503 | 145.43   | 3.35E-03 | 2.18E-01 | 2.72E-02 | Lipid        | Sphingolipid Metabolism                     |

|                    |                                        |         |          |          |          |            |                                          |                                                  |
|--------------------|----------------------------------------|---------|----------|----------|----------|------------|------------------------------------------|--------------------------------------------------|
|                    | orotidine                              | 35172   | 129.73   | 4.56E-03 | 2.96E-01 | 3.00E-02   | Nucleotide                               | Pyrimidine Metabolism, Orotate containing        |
|                    | cysteine                               | 1868    | 187.12   | 4.98E-03 | 3.24E-01 | 3.00E-02   | Amino Acid                               | Methionine, Cysteine, SAM and Taurine Metabolism |
| <b>Neurogranin</b> | N-acetylneuraminate                    | 32377   | 1574.23  | 6.97E-26 | 4.32E-24 | 4.32E-24   | Carbohydrate                             | Aminosugar Metabolism                            |
|                    | C-glycosyltryptophan                   | 48782   | 1442.13  | 9.29E-20 | 5.76E-18 | 2.88E-18   | Amino Acid                               | Tryptophan Metabolism                            |
|                    | N6-succinyladenosine                   | 48130   | 1234.78  | 3.19E-18 | 1.98E-16 | 6.60E-17   | Nucleotide                               | Purine Metabolism, Adenine containing            |
|                    | 1-palmitoyl-2-stearoyl-GPC (16:0/18:0) | 52616   | 1212.87  | 1.38E-17 | 8.53E-16 | 1.89E-16   | Lipid                                    | Phosphatidylcholine (PC)                         |
|                    | arabitol/xylitol                       | 48885   | 1470.51  | 1.53E-17 | 9.48E-16 | 1.89E-16   | Carbohydrate                             | Pentose Metabolism                               |
|                    | N-acetylthreonine                      | 33939   | 1549.35  | 1.83E-17 | 1.13E-15 | 1.89E-16   | Amino Acid                               | Glycine, Serine and Threonine Metabolism         |
|                    | erythronate*                           | 42420   | 2626.14  | 1.19E-16 | 7.40E-15 | 1.06E-15   | Carbohydrate                             | Aminosugar Metabolism                            |
|                    | 1,2-dipalmitoyl-GPC (16:0/16:0)        | 19130   | 1370.31  | 5.60E-16 | 3.47E-14 | 4.34E-15   | Lipid                                    | Phosphatidylcholine (PC)                         |
|                    | 1-palmitoyl-GPC (16:0)                 | 33955   | 1202.61  | 1.09E-15 | 6.78E-14 | 7.54E-15   | Lipid                                    | Lysophospholipid                                 |
| N-acetylserine     | 37076                                  | 1719.96 | 2.67E-15 | 1.65E-13 | 1.65E-14 | Amino Acid | Glycine, Serine and Threonine Metabolism |                                                  |
| <b>YKL-40</b>      | N-acetylneuraminate                    | 32377   | 162.38   | 7.62E-17 | 1.37E-15 | 1.37E-15   | Carbohydrate                             | Aminosugar Metabolism                            |
|                    | 1,2-dipalmitoyl-GPC (16:0/16:0)        | 19130   | 169.92   | 1.71E-16 | 3.08E-15 | 1.54E-15   | Lipid                                    | Phosphatidylcholine (PC)                         |
|                    | stearoyl sphingomyelin (d18:1/18:0)    | 19503   | 160.90   | 8.86E-16 | 1.60E-14 | 5.32E-15   | Lipid                                    | Sphingolipid Metabolism                          |
|                    | 1-palmitoyl-2-stearoyl-GPC (16:0/18:0) | 52616   | 140.55   | 1.05E-14 | 1.89E-13 | 4.65E-14   | Lipid                                    | Phosphatidylcholine (PC)                         |
|                    | 1-palmitoyl-2-oleoyl-GPC (16:0/18:1)   | 52461   | 171.39   | 1.29E-14 | 2.32E-13 | 4.65E-14   | Lipid                                    | Phosphatidylcholine (PC)                         |

|                                           |                                                    |       |          |          |          |          |                          |                                                     |
|-------------------------------------------|----------------------------------------------------|-------|----------|----------|----------|----------|--------------------------|-----------------------------------------------------|
|                                           | arabitol/xylitol                                   | 48885 | 162.00   | 7.35E-14 | 1.32E-12 | 2.21E-13 | Carbohydrate             | Pentose Metabolism                                  |
|                                           | 1-myristoyl-2-palmitoyl-GPC<br>(14:0/16:0)         | 19258 | 147.07   | 4.57E-13 | 8.22E-12 | 1.17E-12 | Lipid                    | Phosphatidylcholine (PC)                            |
|                                           | N6-succinyladenosine                               | 48130 | 121.32   | 2.81E-11 | 5.06E-10 | 6.32E-11 | Nucleotide               | Purine Metabolism, Adenine containing               |
|                                           | cysteine                                           | 1868  | 181.51   | 6.78E-11 | 1.22E-09 | 1.36E-10 | Amino Acid               | Methionine, Cysteine, SAM and Taurine<br>Metabolism |
|                                           | 1-palmitoyl-2-palmitoleoyl-GPC<br>(16:0/16:1)*     | 52470 | 148.93   | 1.16E-10 | 2.09E-09 | 2.09E-10 | Lipid                    | Phosphatidylcholine (PC)                            |
| <b>S100b</b>                              | stearoyl sphingomyelin<br>(d18:1/18:0)             | 19503 | 0.81     | 8.99E-07 | 2.34E-05 | 2.34E-05 | Lipid                    | Sphingolipid Metabolism                             |
|                                           | 1-stearoyl-2-docosaheptaenoyl-<br>GPC (18:0/22:6)  | 52611 | 0.54     | 3.45E-05 | 8.97E-04 | 4.49E-04 | Lipid                    | Phosphatidylcholine (PC)                            |
|                                           | 1-palmitoyl-2-oleoyl-GPC<br>(16:0/18:1)            | 52461 | 0.73     | 6.95E-05 | 1.81E-03 | 6.03E-04 | Lipid                    | Phosphatidylcholine (PC)                            |
|                                           | 1,2-dipalmitoyl-GPC (16:0/16:0)                    | 19130 | 0.67     | 1.07E-04 | 2.79E-03 | 6.96E-04 | Lipid                    | Phosphatidylcholine (PC)                            |
|                                           | 1-palmitoyl-2-docosaheptaenoyl-<br>GPC (16:0/22:6) | 52610 | 0.50     | 1.59E-04 | 4.14E-03 | 8.27E-04 | Lipid                    | Phosphatidylcholine (PC)                            |
|                                           | sphingomyelin (d18:1/18:1,<br>d18:2/18:0)          | 37529 | 0.60     | 2.07E-04 | 5.39E-03 | 8.99E-04 | Lipid                    | Sphingolipid Metabolism                             |
|                                           | erythronate*                                       | 42420 | 1.18     | 3.28E-04 | 8.52E-03 | 1.22E-03 | Carbohydrate             | Aminosugar Metabolism                               |
|                                           | palmitoyl sphingomyelin<br>(d18:1/16:0)            | 37506 | 0.55     | 7.47E-04 | 1.94E-02 | 2.43E-03 | Lipid                    | Sphingolipid Metabolism                             |
| 1-palmitoyl-2-stearoyl-GPC<br>(16:0/18:0) | 52616                                              | 0.50  | 9.45E-04 | 2.46E-02 | 2.73E-03 | Lipid    | Phosphatidylcholine (PC) |                                                     |
| sphingomyelin (d18:2/16:0,                | 42459                                              | 0.44  | 1.53E-03 | 3.97E-02 | 3.96E-03 | Lipid    | Sphingolipid Metabolism  |                                                     |

|                                            |                                            |       |          |          |          |          |                           |                                   |
|--------------------------------------------|--------------------------------------------|-------|----------|----------|----------|----------|---------------------------|-----------------------------------|
|                                            | d18:1/16:1)*                               |       |          |          |          |          |                           |                                   |
| <b>GFAP</b>                                | 1,2-dipalmitoyl-GPC (16:0/16:0)            | 19130 | 10.08    | 1.76E-07 | 1.06E-06 | 1.06E-06 | Lipid                     | Phosphatidylcholine (PC)          |
|                                            | 1-palmitoyl-2-stearoyl-GPC<br>(16:0/18:0)  | 52616 | 8.07     | 9.91E-07 | 5.95E-06 | 2.97E-06 | Lipid                     | Phosphatidylcholine (PC)          |
|                                            | beta-citrylglutamate                       | 54923 | 7.74     | 6.92E-06 | 4.15E-05 | 1.38E-05 | Amino Acid                | Glutamate Metabolism              |
|                                            | N-acetylneuraminate                        | 32377 | 8.00     | 1.59E-05 | 9.56E-05 | 2.39E-05 | Carbohydrate              | Aminosugar Metabolism             |
|                                            | gulonate*                                  | 46957 | 6.71     | 2.75E-05 | 1.65E-04 | 3.30E-05 | Cofactors<br>and Vitamins | Ascorbate and Aldarate Metabolism |
|                                            | arabinose                                  | 575   | 9.80     | 3.71E-04 | 2.22E-03 | 3.71E-04 | Carbohydrate              | Pentose Metabolism                |
| <b>sTREM2</b>                              | stearoyl sphingomyelin<br>(d18:1/18:0)     | 19503 | 9.59     | 5.72E-16 | 1.60E-14 | 1.60E-14 | Lipid                     | Sphingolipid Metabolism           |
|                                            | 1,2-dipalmitoyl-GPC (16:0/16:0)            | 19130 | 9.81     | 1.59E-15 | 4.45E-14 | 2.23E-14 | Lipid                     | Phosphatidylcholine (PC)          |
|                                            | palmitoyl sphingomyelin<br>(d18:1/16:0)    | 37506 | 9.18     | 2.52E-15 | 7.05E-14 | 2.35E-14 | Lipid                     | Sphingolipid Metabolism           |
|                                            | 1-palmitoyl-2-oleoyl-GPC<br>(16:0/18:1)    | 52461 | 10.20    | 9.68E-15 | 2.71E-13 | 6.78E-14 | Lipid                     | Phosphatidylcholine (PC)          |
|                                            | cholesterol                                | 63    | 9.08     | 2.08E-14 | 5.83E-13 | 1.17E-13 | Lipid                     | Sterol                            |
|                                            | 1-palmitoyl-2-stearoyl-GPC<br>(16:0/18:0)  | 52616 | 7.89     | 2.11E-13 | 5.90E-12 | 9.83E-13 | Lipid                     | Phosphatidylcholine (PC)          |
|                                            | sphingomyelin (d18:2/16:0,<br>d18:1/16:1)* | 42459 | 7.19     | 3.53E-13 | 9.88E-12 | 1.41E-12 | Lipid                     | Sphingolipid Metabolism           |
|                                            | C-glycosyltryptophan                       | 48782 | 8.51     | 2.09E-12 | 5.86E-11 | 7.33E-12 | Amino Acid                | Tryptophan Metabolism             |
|                                            | N-acetylneuraminate                        | 32377 | 8.35     | 2.55E-12 | 7.13E-11 | 7.92E-12 | Carbohydrate              | Aminosugar Metabolism             |
| 1-myristoyl-2-palmitoyl-GPC<br>(14:0/16:0) | 19258                                      | 8.45  | 3.18E-12 | 8.90E-11 | 8.90E-12 | Lipid    | Phosphatidylcholine (PC)  |                                   |

|                                      |                                            |       |        |          |          |          |              |                                             |
|--------------------------------------|--------------------------------------------|-------|--------|----------|----------|----------|--------------|---------------------------------------------|
| <b><math>\alpha</math>-synuclein</b> | 1-palmitoyl-2-stearoyl-GPC<br>(16:0/18:0)  | 52616 | 306.42 | 1.42E-22 | 1.42E-20 | 1.42E-20 | Lipid        | Phosphatidylcholine (PC)                    |
|                                      | 1,2-dipalmitoyl-GPC (16:0/16:0)            | 19130 | 337.75 | 5.02E-20 | 5.02E-18 | 2.51E-18 | Lipid        | Phosphatidylcholine (PC)                    |
|                                      | N-acetylneuraminate                        | 32377 | 315.50 | 2.29E-19 | 2.29E-17 | 7.64E-18 | Carbohydrate | Aminosugar Metabolism                       |
|                                      | stearoyl sphingomyelin<br>(d18:1/18:0)     | 19503 | 316.41 | 1.31E-18 | 1.31E-16 | 3.28E-17 | Lipid        | Sphingolipid Metabolism                     |
|                                      | 1-stearoyl-2-oleoyl-GPC<br>(18:0/18:1)     | 52438 | 334.85 | 8.69E-18 | 8.69E-16 | 1.74E-16 | Lipid        | Phosphatidylcholine (PC)                    |
|                                      | C-glycosyltryptophan                       | 48782 | 304.78 | 3.58E-17 | 3.58E-15 | 5.82E-16 | Amino Acid   | Tryptophan Metabolism                       |
|                                      | palmitoyl sphingomyelin<br>(d18:1/16:0)    | 37506 | 297.65 | 4.24E-17 | 4.24E-15 | 5.82E-16 | Lipid        | Sphingolipid Metabolism                     |
|                                      | N-acetylthreonine                          | 33939 | 343.71 | 4.65E-17 | 4.65E-15 | 5.82E-16 | Amino Acid   | Glycine, Serine and Threonine<br>Metabolism |
|                                      | N6-succinyladenosine                       | 48130 | 266.82 | 9.85E-17 | 9.85E-15 | 1.09E-15 | Nucleotide   | Purine Metabolism, Adenine containing       |
|                                      | 1-myristoyl-2-palmitoyl-GPC<br>(14:0/16:0) | 19258 | 300.75 | 1.17E-16 | 1.17E-14 | 1.17E-15 | Lipid        | Phosphatidylcholine (PC)                    |

853 \* Indicates a compound that has not been confirmed based on a standard, but Metabolon was confident in its identity.

854 **Table 3. Prediction performance ( $r^2$ ) of metabolites in the combined cohort of WRAP and Wisconsin ADRC.**

| <b>NTK biomarkers</b>                | <b>Base model <math>r^2</math> (sample size*)</b> | <b>Number of input metabolites</b> | <b>Metabolite model <math>r^2</math> (sample size*)</b> | <b>Number of elastic net-selected metabolites</b> | <b>Elastic net-selected metabolites model <math>r^2</math> (sample size*)</b> |
|--------------------------------------|---------------------------------------------------|------------------------------------|---------------------------------------------------------|---------------------------------------------------|-------------------------------------------------------------------------------|
| <b>P-tau</b>                         | 0.11 (n=295)                                      | 40                                 | 0.72 (n=226)                                            | 22                                                | 0.70 (n=232)                                                                  |
| <b>T-tau</b>                         | 0.10 (n=296)                                      | 44                                 | 0.71 (n=236)                                            | 17                                                | 0.69 (n=281)                                                                  |
| <b>A<math>\beta</math>42</b>         | 0.01 (n=296)                                      | 54                                 | 0.55 (n=220)                                            | 43                                                | 0.54 (n=222)                                                                  |
| <b>A<math>\beta</math>40</b>         | 0.04 (n=293)                                      | 73                                 | 0.85 (n=162)                                            | 70                                                | 0.83 (n=166)                                                                  |
| <b>NfL</b>                           | 0.10 (n=297)                                      | 23                                 | 0.23(n=280)                                             | 13                                                | 0.22 (n=290)                                                                  |
| <b>Neurogranin</b>                   | 0.07 (n=297)                                      | 51                                 | 0.78 (n=245)                                            | 32                                                | 0.76 (n=267)                                                                  |
| <b>YKL-40</b>                        | 0.25 (n=297)                                      | 15                                 | 0.57 (n=281)                                            | 10                                                | 0.56 (n=288)                                                                  |
| <b>S100</b>                          | 0.05 (n=296)                                      | 20                                 | 0.22 (n=281)                                            | 4                                                 | 0.19 (n=293)                                                                  |
| <b>GFAP</b>                          | 0.17 (n=297)                                      | 6                                  | 0.35 (n=282)                                            | 5                                                 | 0.35(n=288)                                                                   |
| <b>sTREM2</b>                        | 0.05 (n=297)                                      | 27                                 | 0.52 (n=276)                                            | 14                                                | 0.50 (n=283)                                                                  |
| <b><math>\alpha</math>-synuclein</b> | 0.03 (n=297)                                      | 90                                 | 0.97 (n=105)                                            | 27                                                | 0.68 (n=218)                                                                  |

855 Variables included in the base model were age, sex, years of education and cohort.

856 Variables included in the metabolite model were age, sex, years of education, cohort and all replicated significant metabolites for  
857 each biomarker.

858 Variables included in the metabolite model were age, sex, years of education, cohort and elastic net-selected metabolites.

859 \* The sample sizes were different because of the missingness of metabolites.

860 **Table 4. Significant Mendelian randomization results after Bonferroni correction.**

| NTK<br>biomarkers   | Metabolite                                  | Compound<br>ID | nSNPs | nRegions<br>(1Mbps) | F<br>statistics | LIML<br>estimate | LIML 95% CI |          | LIML p   | Adjusted<br>p |
|---------------------|---------------------------------------------|----------------|-------|---------------------|-----------------|------------------|-------------|----------|----------|---------------|
|                     |                                             |                |       |                     |                 |                  |             |          |          |               |
| sTREM2              | palmitoyl sphingomyelin<br>(d18:1/16:0)     | 37506          | 67    | 21                  | 1.97            | 12.97            | 9.14        | 16.80    | 2.09E-10 | 2.50E-08      |
| A $\beta$ 40        | erythritol                                  | 20699          | 100   | 34                  | 6.09            | 12499.02         | 7539.22     | 17458.82 | 1.40E-06 | 1.61E-04      |
| $\alpha$ -synuclein | homocarnosine                               | 1633           | 43    | 14                  | 2.61            | -123.04          | -172.61     | -73.47   | 1.96E-06 | 2.23E-04      |
| T-tau               | 1-palmitoyl-2-stearoyl-<br>GPC (16:0/18:0)  | 52616          | 19    | 8                   | 2.81            | 319.63           | 187.99      | 451.28   | 3.21E-06 | 3.59E-04      |
| $\alpha$ -synuclein | erythritol                                  | 20699          | 100   | 34                  | 5.95            | 172.93           | 99.70       | 246.16   | 5.69E-06 | 6.31E-04      |
| Neurogranin         | 1-palmitoyl-2-stearoyl-<br>GPC (16:0/18:0)  | 52616          | 19    | 8                   | 2.82            | 1433.89          | 799.21      | 2068.57  | 1.37E-05 | 1.49E-03      |
| A $\beta$ 40        | 1-myristoyl-2-palmitoyl-<br>GPC (14:0/16:0) | 19258          | 38    | 20                  | 2.48            | 18666.39         | 10385.64    | 26947.14 | 1.43E-05 | 1.54E-03      |
| T-tau               | 1-palmitoyl-2-stearoyl-<br>GPC (16:0/18:0)  | 52616          | 19    | 8                   | 2.79            | 28.06            | 15.50       | 40.62    | 1.70E-05 | 1.82E-03      |
| $\alpha$ -synuclein | 1-palmitoyl-2-stearoyl-<br>GPC (16:0/18:0)  | 52616          | 19    | 8                   | 2.82            | 268.34           | 137.78      | 398.90   | 7.16E-05 | 7.59E-03      |
| A $\beta$ 40        | 1,2-dipalmitoyl-GPC<br>(16:0/16:0)          | 19130          | 5     | 2                   | 6.78            | 25973.09         | 12768.09    | 39178.09 | 1.41E-04 | 1.48E-02      |



|              |               |       |    |    |      |          |          |          |          |          |
|--------------|---------------|-------|----|----|------|----------|----------|----------|----------|----------|
| A $\beta$ 40 | homocarnosine | 1633  | 43 | 14 | 2.55 | -6548.41 | -9903.63 | -3193.19 | 1.58E-04 | 1.65E-02 |
| Neurogranin  | homocarnosine | 1633  | 43 | 14 | 2.61 | -444.47  | -675.36  | -213.58  | 1.93E-04 | 1.99E-02 |
| A $\beta$ 40 | gulonate*     | 46957 | 25 | 13 | 6.34 | 12658.31 | 6029.03  | 19287.58 | 2.17E-04 | 2.21E-02 |

861 The nSNPs refers to the number of SNPs in each IV, and the nRegions is the approximate number of regions defined by up to a 1Mbps  
862 of the SNPs. The F statistic represent the strength of the IV (strong IV F statistic >10). The estimate of beta, confidence interval and p  
863 values were all based on the limited information maximum likelihood (LIML) method.

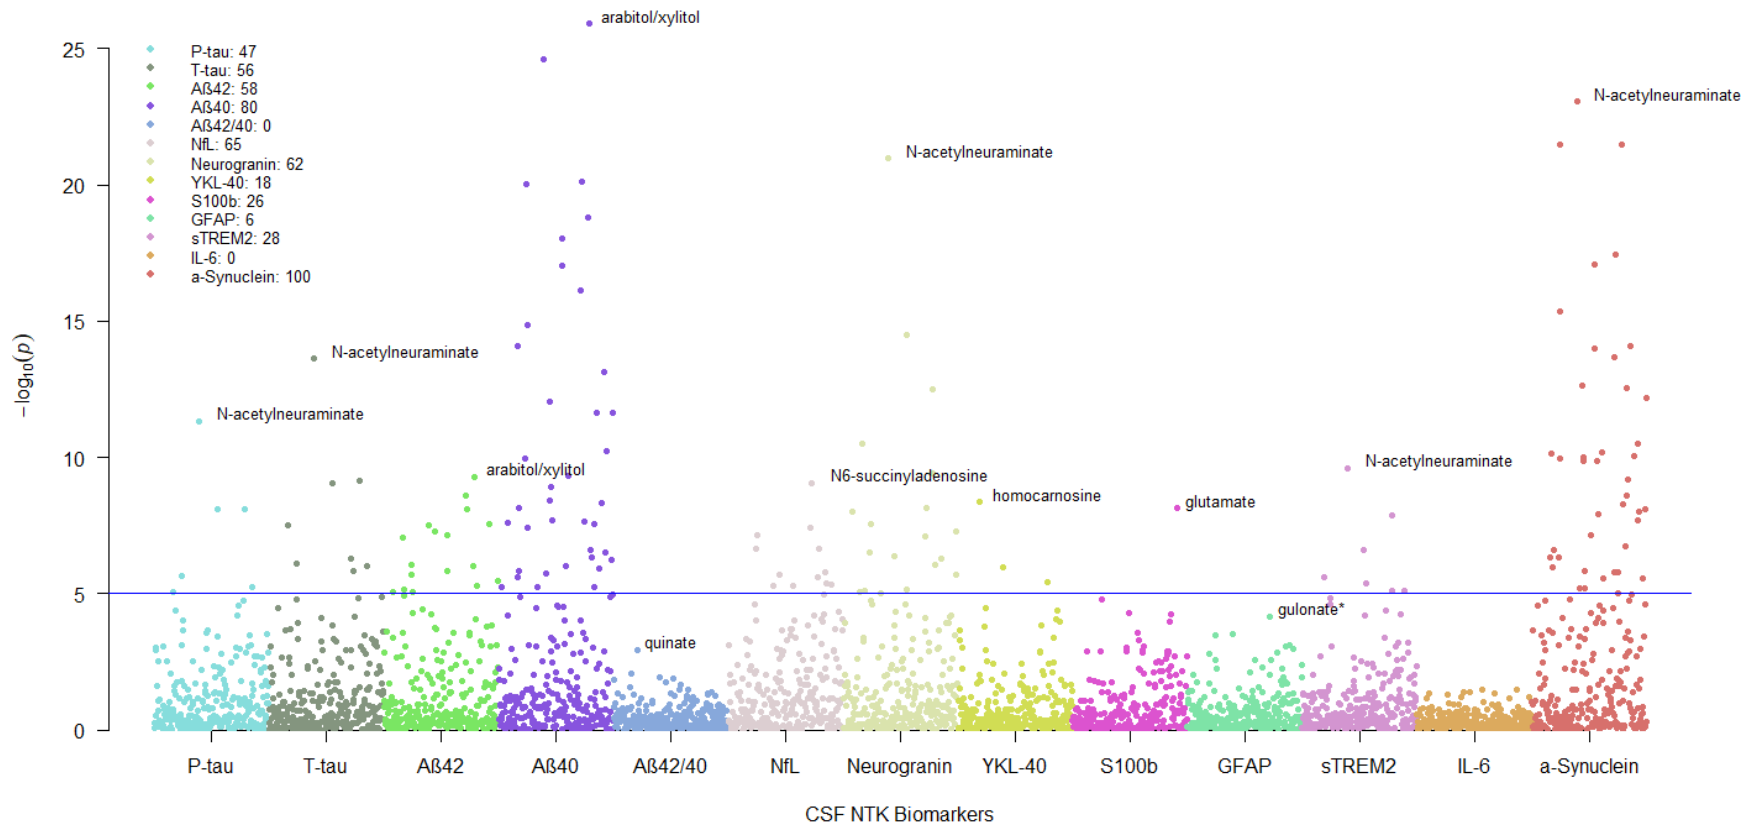

(a)

864

865

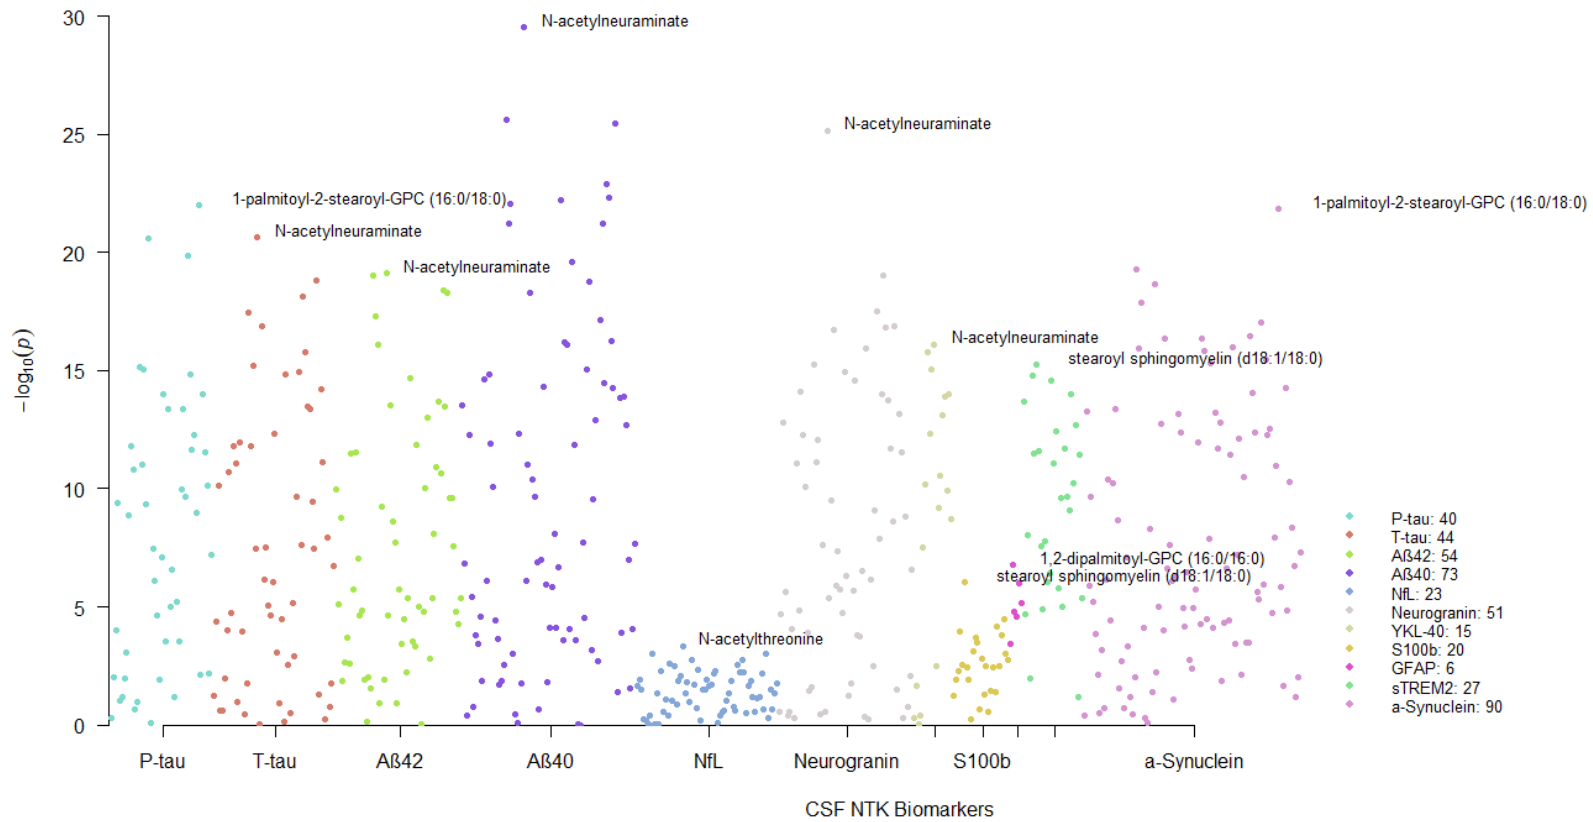

(b)

866

867

868 **Figure 1. Manhattan plots of MWAS results between CSF metabolites and CSF NTK biomarkers.** Each dot represents a

869 metabolite and the different colors represent the CSF NTK biomarkers (x-axis) in (a) WRAP and (b) the Wisconsin ADRC (only

870 significant metabolites after FDR correction in WRAP were included). The  $-\log_{10}(\text{p-value})$  is shown on the y-axis. The legend box  
871 indicates the number of metabolites that were significant after FDR correction for each NTK biomarker.

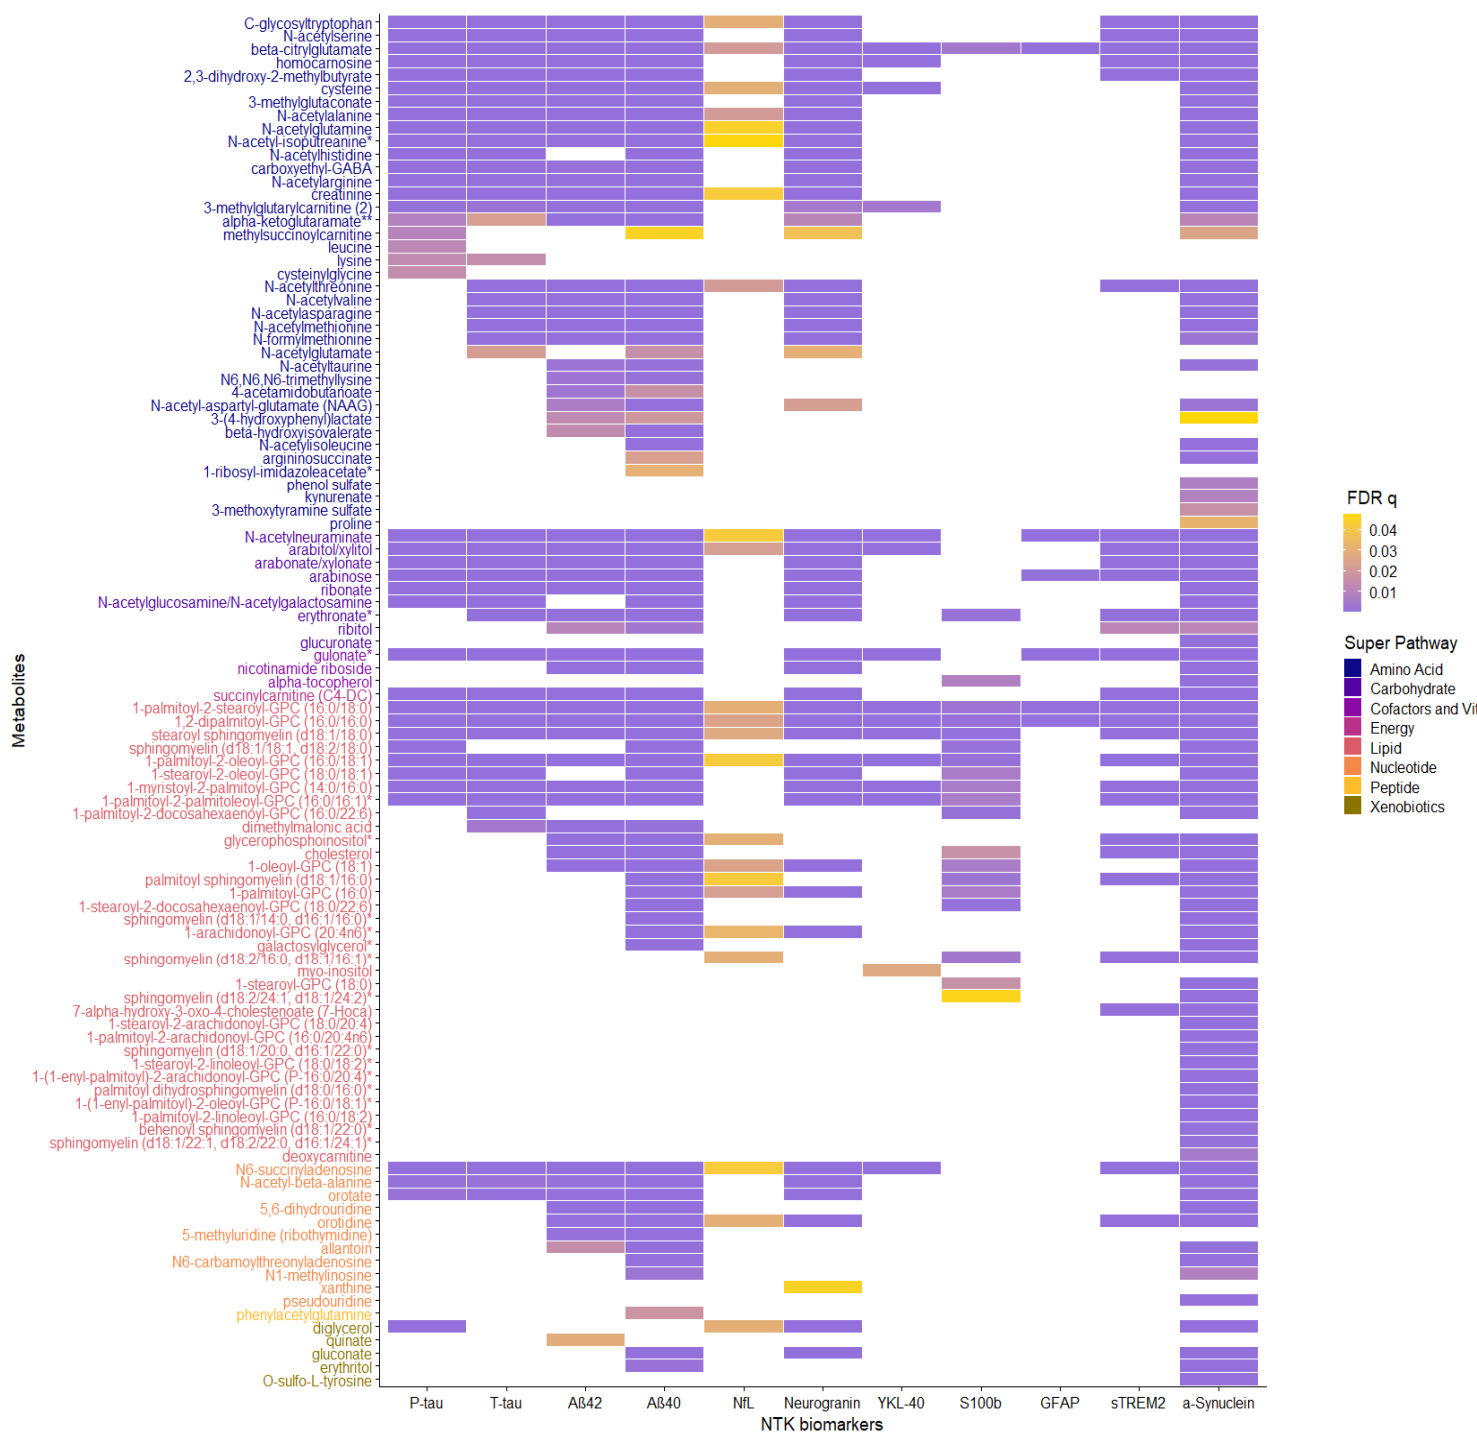

**Figure 2. The association patterns between significant CSF metabolites and CSF NTK**

**biomarkers in Wisconsin-ADRC. Each cell represents the association of a CSF metabolites with a**

**biomarker. The color scale indicates the magnitude of the FDR q values. The metabolites are also grouped and**

**colored based on their super pathway.**
